# Supplementary material for: Geology, Mineralogy, and Age of Li-Bearing Pegmatites: Case Study of Tochka Deposit (East Kazakhstan)
Source: MDPI journal article supplement (doi:10.3390/min12121478), 2022-11-22
Supplement: s1 [file s1]

## Supplementary Table S1

The composition of accessory minerals from hornfels, wt. %

| Sample      |       | O     | Na   | Mg   | Al   | Si    | S     | P    | K    | Ca   | Ti    | Mn   | Fe    | Y     | Sn    | Zr    | La   | Ce    | Nd   | Th   | Dy   |
|-------------|-------|-------|------|------|------|-------|-------|------|------|------|-------|------|-------|-------|-------|-------|------|-------|------|------|------|
| ilmenite    | TO-11 | 45.38 | 1.69 |      | 5.58 | 11.50 |       |      | 1.29 |      | 16.28 | 2.07 | 16.21 |       |       |       |      |       |      |      |      |
| ilmenite    | TO-11 | 50.30 | 1.96 |      | 4.47 | 12.72 |       |      | 0.72 | 0.61 | 15.58 | 0.69 | 12.96 |       |       |       |      |       |      |      |      |
| ilmenite    | TO-11 | 47.38 | 2.11 | 0.42 | 5.29 | 13.52 |       |      | 0.96 | 0.62 | 14.06 | 1.36 | 14.28 |       |       |       |      |       |      |      |      |
| ilmenite    | TO-5  | 49.68 | 1.56 | 1.01 | 5.86 | 11.87 |       |      | 2.01 |      | 12.95 | 0.91 | 14.16 |       |       |       |      |       |      |      |      |
| ilmenite    | TO-5  | 47.70 | 1.44 | 1.12 | 7.7  | 11.85 |       |      | 2.42 | 0.46 | 11.45 | 1.42 | 14.44 |       |       |       |      |       |      |      |      |
| magnetite   | TO-5  | 51.16 | 1.13 | 3.15 | 9.72 | 19.13 |       |      | 4.87 |      | 0.94  |      | 9.9   |       |       |       |      |       |      |      |      |
| pyrite      | TO-11 | 25.00 | 2.51 |      | 4.82 | 10.73 | 21.01 |      | 0.48 | 0.71 |       |      | 34.75 |       |       |       |      |       |      |      |      |
| cassiterite | TO-11 | 52.31 | 1.24 |      | 3.11 | 18.53 |       |      |      |      |       |      | 1.12  |       | 23.69 |       |      |       |      |      |      |
| xenotime    | TO-11 | 52.1  | 2.59 |      | 6.38 | 16.58 |       | 5.92 | 1.05 | 1.33 |       |      | 1.28  | 12.77 |       |       |      |       |      |      |      |
| xenotime    | TO-11 | 47.90 | 1.38 |      | 4.93 | 11.76 |       | 8.25 | 1.56 | 0.63 |       |      | 1.90  | 18.51 |       |       |      |       |      |      | 3.19 |
| monazite    | TO-11 | 46.49 | 1.36 |      | 6.72 | 13.37 |       | 7.44 | 1.60 | 0.71 |       |      | 1.52  |       |       |       | 4.29 | 12.01 | 4.48 |      |      |
| monazite    | TO-11 | 41.36 | 2.53 |      | 5.99 | 14.27 |       | 6.43 | 1.09 | 0.99 |       |      | 0.95  |       |       |       | 5.49 | 13.1  | 6.02 | 1.79 |      |
| monazite    | TO-5  | 43.01 | 1.06 | 1.53 | 7.04 | 13.79 |       | 6.01 | 2.04 | 0.66 |       |      | 4.11  |       |       |       | 4.52 | 11.03 | 4.09 | 1.12 |      |
| monazite    | TO-5  | 46.09 | 1.65 | 1.62 | 7.49 | 15.51 |       | 4.50 | 2.62 | 0.63 |       |      | 5.27  |       |       |       | 2.37 | 7.92  | 2.77 | 1.58 |      |
| zircon      | TO-5  | 55.04 | 1.01 | 0.93 | 5.32 | 25.73 |       |      | 1.79 |      |       |      | 3.59  |       |       | 6.6   |      |       |      |      |      |
| zircon      | TO-5  | 48.51 | 1.36 | 1.22 | 7.6  | 17.32 |       |      | 3.12 |      |       |      | 3.69  |       |       | 16.02 |      |       |      |      |      |

\*Components likely captured from the host mineral are marked by red color

## Supplementary Table S2

The composition of accessory minerals from Na-granites, wt. %

| Sample       |       | O     | Na   | Mg   | Al   | Si    | S    | P     | K    | Ca    | Ti   | Fe   | W     | Zn    | Co   | Ni   | Zr    | As   | La    | Ce   | Nd   |
|--------------|-------|-------|------|------|------|-------|------|-------|------|-------|------|------|-------|-------|------|------|-------|------|-------|------|------|
| apatite      | TO-4  | 50.13 | 2.12 | 0.24 | 4.39 | 9.49  |      | 11.44 | 0.17 | 19.50 |      | 0.89 |       |       |      |      |       |      | 0.38  | 0.89 | 0.38 |
| apatite      | TO-10 | 50.32 |      |      | 2.05 | 8.22  |      | 13.21 |      | 26.20 |      |      |       |       |      |      |       |      |       |      |      |
| zircon       | TO-10 | 51.12 | 2.16 | 1.1  | 5.21 | 20.40 |      |       |      | 1.69  |      | 2.65 |       |       |      |      | 15.67 |      |       |      |      |
| zircon       | TO-10 | 49.36 | 2.18 |      | 4.68 | 20.23 |      |       |      | 1.27  |      | 0.67 |       |       |      |      | 21.61 |      |       |      |      |
| zircon       | TO-10 | 51.46 |      | 0.41 | 4.20 | 17.65 |      |       |      | 5.26  |      | 0.49 |       |       |      |      | 20.52 |      |       |      |      |
| monazite     | TO-4  | 42.32 | 2.61 |      | 6.16 | 12.51 |      | 8.04  |      | 2.64  |      | 0.9  |       |       |      |      |       | 5.66 | 13.12 | 6.06 |      |
| sphene       | TO-10 | 55.51 | 2.21 | 0.94 | 5.93 | 20.17 |      |       |      | 7.48  | 5.86 | 1.91 |       |       |      |      |       |      |       |      |      |
| sphalerite   | TO-10 | 35.46 |      | 1.21 | 6.39 | 18.30 | 8.07 |       |      | 1.8   |      | 3.02 |       | 25.76 |      |      |       |      |       |      |      |
| tungstite    | TO-10 | 45.32 | 3.13 |      | 6.45 | 17.99 |      |       |      | 1.73  |      | 0.51 | 24.88 |       |      |      |       |      |       |      |      |
| gersdorffite | TO-10 | 42.76 | 1.13 |      | 8.23 | 22.75 | 4.09 |       | 6.07 | 0.63  |      | 4.42 |       |       | 2.32 | 1.87 |       | 5.72 |       |      |      |

\*Components likely captured from the host mineral are marked by red color

## Supplementary Table S3

The composition of accessory minerals from pegmatites, wt. %

| Sample      |       | O     | Na   | Al    | Si    | S    | P     | K    | Ca    | Ti   | Fe   | Mn    | Zn    | Sn    | Nb    | Ta   | Zr   | Y     | U     | Hf | La   | Ce   | Nd   | Dy   | Cu   |
|-------------|-------|-------|------|-------|-------|------|-------|------|-------|------|------|-------|-------|-------|-------|------|------|-------|-------|----|------|------|------|------|------|
| apatite     | TO-12 | 55.63 | 3.41 | 4.29  | 26.85 |      | 3.67  |      | 6.15  |      |      |       |       |       |       |      |      |       |       |    |      |      |      |      |      |
| apatite     | TO-50 | 51.45 | 2.97 | 3.47  | 9.7   |      | 12.09 | 0.48 | 19.42 |      |      | 0.42  |       |       |       |      |      |       |       |    |      |      |      |      |      |
| monazite    | TO-9  | 49.62 | 3.51 | 5.99  | 27.80 |      | 2.59  |      | 1.06  |      | 0.65 |       |       |       |       |      |      |       |       |    | 1.93 | 4.20 | 2.64 |      |      |
| monazite    | TO-9  | 47.62 | 1.99 | 3.97  | 26.67 |      | 4.47  |      | 0.85  |      | 0.62 |       |       |       |       |      |      |       |       |    | 2.92 | 7.05 | 3.85 |      |      |
| xenotime    | TO-9  | 52.71 | 2.05 | 5.74  | 21.22 |      | 5.16  | 0.85 | 0.83  |      |      |       |       |       |       |      |      | 10.03 |       |    |      |      |      | 1.41 |      |
| zircon      | TO-9  | 54.64 | 0.51 | 1.51  | 38.97 |      |       | 0.36 |       |      |      |       |       |       |       |      | 4.01 |       |       |    |      |      |      |      |      |
| zircon      | TO-12 | 53.74 | 3.93 | 4.77  | 27.53 |      |       | 0.37 |       |      |      |       |       |       |       |      | 9.66 |       |       |    |      |      |      |      |      |
| uraninite   | TO-12 | 49.79 | 3.92 | 5.19  | 26.46 |      |       |      |       |      | 0.64 |       |       |       |       |      | 2.81 |       | 11.18 |    |      |      |      |      |      |
| rutile      | TO-13 | 55.41 | 0.68 | 7.32  | 24.69 |      |       | 2.69 |       | 7.01 | 1.11 |       |       |       | 1.09  |      |      |       |       |    |      |      |      |      |      |
| sphalerite  | TO-13 | 44.29 |      | 10.69 | 21.91 | 4.94 |       |      |       |      | 3.31 |       | 14.86 |       |       |      |      |       |       |    |      |      |      |      |      |
| pyrolusite  | TO-50 | 46.71 | 1.01 | 3.33  | 8.17  |      |       | 2.99 | 0.94  |      |      | 34.48 |       |       |       |      |      |       |       |    |      |      |      |      | 0.60 |
| columbite   | TO-12 | 51.14 | 3.54 | 5.31  | 22.03 |      |       | 1.52 |       | 0.44 | 2.76 | 1.81  |       |       | 11.47 |      |      |       |       |    |      |      |      |      |      |
| columbite   | TO-12 | 50.17 | 5.26 | 6.89  | 23.55 |      |       |      |       |      | 2.53 | 1.54  |       |       | 8.15  | 1.92 |      |       |       |    |      |      |      |      |      |
| columbite   | TO-50 | 48.90 | 4.49 | 5.31  | 16.30 |      | 1.44  | 0.30 | 2.20  | 0.50 | 1.71 | 3.66  |       |       | 10.95 |      |      |       |       |    |      |      |      |      |      |
| columbite   | TO-50 | 42.30 | 3.28 | 3.39  | 11.45 |      |       |      |       | 0.77 | 3.61 | 4.27  |       |       | 18.50 |      |      |       |       |    |      |      |      |      |      |
| cassiterite | TO-12 | 54.10 | 2.46 | 7.03  | 23.48 |      |       |      |       |      | 0.68 |       |       | 12.26 |       |      |      |       |       |    |      |      |      |      |      |
| cassiterite | TO-13 | 56.84 | 1.23 | 10.01 | 21.22 |      |       |      |       |      | 0.58 |       |       | 10.11 |       |      |      |       |       |    |      |      |      |      |      |
| cassiterite | TO-50 | 46.76 | 2.88 | 3.20  | 8.68  |      | 0.42  |      |       |      |      |       |       | 33.28 |       |      |      |       |       |    |      |      |      |      |      |
| cassiterite | TO-50 | 48.63 | 1.85 | 4.16  | 11.42 |      |       |      |       |      | 0.55 |       |       | 33.38 |       |      |      |       |       |    |      |      |      |      |      |
| cassiterite | TO-50 | 47.77 | 3.53 | 4.33  | 11.57 |      |       |      |       |      | 0.62 |       |       | 32.19 |       |      |      |       |       |    |      |      |      |      |      |

\*Components likely captured from the host mineral are marked by red color
