# Supplementary material for: Geology, Mineralogy, and Age of Li-Bearing Pegmatites: Case Study of Tochka Deposit (East Kazakhstan)
Source: MDPI journal article supplement (doi:10.3390/min12121478), 2022-11-22
Supplement: s1 [file s1]

Supplementary Table S5

<sup>40</sup>Ar-<sup>39</sup>Ar dating results of muscovite from pegmatite samples of the Tochka deposit

| T°C                                                                                                           | <sup>40</sup> Ar<br>(cm <sup>3</sup> STP) | <sup>40</sup> Ar/ <sup>39</sup> Ar | ±1σ   | <sup>38</sup> Ar/ <sup>39</sup> Ar | ±1σ    | <sup>37</sup> Ar/ <sup>39</sup> Ar | ±1σ    | <sup>36</sup> Ar/ <sup>39</sup> Ar | ±1σ    | Ca/K   | Σ <sup>39</sup> Ar<br>(%) | Age<br>(Ma)<br>±1σ | ±1σ   | <sup>40</sup> Ar*<br>(%) |
|---------------------------------------------------------------------------------------------------------------|-------------------------------------------|------------------------------------|-------|------------------------------------|--------|------------------------------------|--------|------------------------------------|--------|--------|---------------------------|--------------------|-------|--------------------------|
| <b>Sample 63-TO, weight 39.93 mg, J = 0.004450 ± 0.000052, plateau age (800-1250°C) = 293.2 ± 3.5 Ma (1σ)</b> |                                           |                                    |       |                                    |        |                                    |        |                                    |        |        |                           |                    |       |                          |
| 500                                                                                                           | 6.3×10 <sup>-9</sup>                      | 30.119                             | 0.172 | 0.1572                             | 0.0107 | 0.6234                             | 0.0305 | 0.0572                             | 0.0017 | 2.244  | 0.4                       | 103.19             | 4.04  | 43.9                     |
| 600                                                                                                           | 4.9×10 <sup>-9</sup>                      | 38.553                             | 0.787 | 0.4810                             | 0.0128 | 1.5719                             | 0.1272 | 0.0882                             | 0.0117 | 5.659  | 0.7                       | 97.55              | 26.15 | 32.4                     |
| 700                                                                                                           | 20.5×10 <sup>-9</sup>                     | 43.620                             | 0.331 | 0.0858                             | 0.0063 | 0.2710                             | 0.0428 | 0.0290                             | 0.0092 | 0.975  | 1.6                       | 261.48             | 19.19 | 80.3                     |
| 800                                                                                                           | 118.3×10 <sup>-9</sup>                    | 42.124                             | 0.201 | 0.0313                             | 0.0013 | 0.0650                             | 0.0073 | 0.0085                             | 0.0018 | 0.234  | 7.4                       | 292.86             | 4.91  | 94.0                     |
| 880                                                                                                           | 205.1×10 <sup>-9</sup>                    | 40.814                             | 0.051 | 0.0160                             | 0.0008 | 0.0342                             | 0.0037 | 0.0028                             | 0.0009 | 0.123  | 17.7                      | 295.47             | 3.66  | 98.0                     |
| 940                                                                                                           | 592.2×10 <sup>-9</sup>                    | 39.975                             | 0.046 | 0.0139                             | 0.0005 | 0.0082                             | 0.0011 | 0.0010                             | 0.0001 | 0.030  | 48.0                      | 293.3              | 3.2   | 99.2                     |
| 1000                                                                                                          | 239.2×10 <sup>-9</sup>                    | 39.843                             | 0.064 | 0.0160                             | 0.0014 | 0.0261                             | 0.0036 | 0.0002                             | 0.0007 | 0.094  | 60.3                      | 294.0              | 3.5   | 99.8                     |
| 1070                                                                                                          | 179.2×10 <sup>-9</sup>                    | 40.243                             | 0.040 | 0.0204                             | 0.0011 | 0.0244                             | 0.0029 | 0.0017                             | 0.0010 | 0.088  | 69.4                      | 293.83             | 3.72  | 98.8                     |
| 1140                                                                                                          | 422.5×10 <sup>-9</sup>                    | 39.958                             | 0.028 | 0.0156                             | 0.0004 | 0.0084                             | 0.0015 | 0.0012                             | 0.0004 | 0.030  | 91.1                      | 292.87             | 3.27  | 99.1                     |
| 1210                                                                                                          | 153.5×10 <sup>-9</sup>                    | 39.963                             | 0.039 | 0.0166                             | 0.0004 | 0.0081                             | 0.0031 | 0.0010                             | 0.0007 | 0.029  | 99.0                      | 293.22             | 3.44  | 99.2                     |
| 1250                                                                                                          | 20.1×10 <sup>-9</sup>                     | 39.456                             | 0.166 | 0.0343                             | 0.0030 | 0.1049                             | 0.0118 | 0.0012                             | 0.0019 | 0.378  | 100.0                     | 289.32             | 5.12  | 99.1                     |
| <b>Sample 64-TO, weight 40.35 mg, J = 0.005376 ± 0.000075, plateau age (880-1240°C) = 292.3 ± 3.6 Ma (1σ)</b> |                                           |                                    |       |                                    |        |                                    |        |                                    |        |        |                           |                    |       |                          |
| 500                                                                                                           | 2.8×10 <sup>-9</sup>                      | 21.011                             | 1.679 | 0.7509                             | 0.0292 | 3.1179                             | 0.1227 | 0.0667                             | 0.0103 | 11.225 | 0.2                       | 12.6               | 32.1  | 6.2                      |
| 600                                                                                                           | 2.8×10 <sup>-9</sup>                      | 24.669                             | 1.113 | 0.9832                             | 0.0406 | 3.8809                             | 0.2691 | 0.0783                             | 0.0090 | 13.971 | 0.5                       | 14.7               | 25.9  | 6.2                      |
| 700                                                                                                           | 9.7×10 <sup>-9</sup>                      | 35.022                             | 0.935 | 0.1970                             | 0.0099 | 0.9417                             | 0.0484 | 0.0435                             | 0.0085 | 3.390  | 1.0                       | 203.1              | 22.3  | 63.3                     |
| 800                                                                                                           | 46.5×10 <sup>-9</sup>                     | 38.267                             | 0.212 | 0.0524                             | 0.0022 | 0.1160                             | 0.0112 | 0.0124                             | 0.0012 | 0.418  | 3.2                       | 307.9              | 5.2   | 90.5                     |
| 880                                                                                                           | 178.1×10 <sup>-9</sup>                    | 34.835                             | 0.091 | 0.0214                             | 0.0004 | 0.0320                             | 0.0054 | 0.0062                             | 0.0005 | 0.115  | 12.8                      | 294.7              | 4.0   | 94.8                     |
| 940                                                                                                           | 597.5×10 <sup>-9</sup>                    | 33.104                             | 0.072 | 0.0135                             | 0.0004 | 0.0077                             | 0.0008 | 0.0010                             | 0.0001 | 0.028  | 46.4                      | 293.2              | 3.8   | 99.1                     |
| 1000                                                                                                          | 72.8×10 <sup>-9</sup>                     | 32.844                             | 0.094 | 0.0180                             | 0.0012 | 0.0271                             | 0.0029 | 0.0026                             | 0.0011 | 0.098  | 50.5                      | 286.9              | 4.6   | 97.6                     |
| 1080                                                                                                          | 204.5×10 <sup>-9</sup>                    | 32.992                             | 0.079 | 0.0169                             | 0.0005 | 0.0228                             | 0.0033 | 0.0017                             | 0.0005 | 0.082  | 62.0                      | 290.4              | 4.0   | 98.5                     |
| 1120                                                                                                          | 138.9×10 <sup>-9</sup>                    | 33.051                             | 0.057 | 0.0202                             | 0.0005 | 0.0215                             | 0.0063 | 0.0002                             | 0.0006 | 0.077  | 69.9                      | 294.5              | 4.1   | 99.8                     |
| 1160                                                                                                          | 352.9×10 <sup>-9</sup>                    | 32.900                             | 0.054 | 0.0165                             | 0.0004 | 0.0131                             | 0.0032 | 0.0009                             | 0.0004 | 0.047  | 89.9                      | 291.7              | 3.9   | 99.2                     |
| 1240                                                                                                          | 179.0×10 <sup>-9</sup>                    | 32.872                             | 0.058 | 0.0150                             | 0.0009 | 0.0145                             | 0.0038 | 0.0001                             | 0.0006 | 0.052  | 100.0                     | 293.3              | 4.1   | 99.9                     |

J – characteristic of the neutron flux during irradiation of samples.

| T°C                                                                                                    | <sup>40</sup> Ar<br>(cm <sup>3</sup> STP) | <sup>40</sup> Ar/ <sup>39</sup> Ar | ±1σ   | <sup>38</sup> Ar/ <sup>39</sup> Ar | ±1σ    | <sup>37</sup> Ar/ <sup>39</sup> Ar | ±1σ    | <sup>36</sup> Ar/ <sup>39</sup> Ar | ±1σ    | Ca/K   | Σ <sup>39</sup> Ar<br>(%) | Age<br>(Ma)<br>±1σ | ±1σ   | <sup>40</sup> Ar*<br>(%) |
|--------------------------------------------------------------------------------------------------------|-------------------------------------------|------------------------------------|-------|------------------------------------|--------|------------------------------------|--------|------------------------------------|--------|--------|---------------------------|--------------------|-------|--------------------------|
| Sample 65-TO, weight 20.16 mg, J = 0.005335 ± 0.000074, plateau age (850-1150°C) = 290.4 ± 4.2 Ma (1σ) |                                           |                                    |       |                                    |        |                                    |        |                                    |        |        |                           |                    |       |                          |
| 500                                                                                                    | 2.0×10 <sup>-9</sup>                      | 20.762                             | 1.742 | 2.0477                             | 0.1436 | 5.1444                             | 0.3548 | 0.0592                             | 0.0428 | 18.520 | 0.5                       | 31.2               | 119.7 | 15.8                     |
| 630                                                                                                    | 7.5×10 <sup>-9</sup>                      | 33.773                             | 1.736 | 0.7325                             | 0.0381 | 1.9362                             | 0.2412 | 0.1020                             | 0.0340 | 6.970  | 1.5                       | 34.7               | 94.0  | 10.8                     |
| 750                                                                                                    | 36.2×10 <sup>-9</sup>                     | 35.519                             | 0.306 | 0.0831                             | 0.0031 | 0.1413                             | 0.0368 | 0.0187                             | 0.0073 | 0.509  | 6.3                       | 267.7              | 18.2  | 84.4                     |
| 850                                                                                                    | 89.5×10 <sup>-9</sup>                     | 36.568                             | 0.114 | 0.0330                             | 0.0028 | 0.0294                             | 0.0144 | 0.0098                             | 0.0027 | 0.106  | 18.0                      | 298.0              | 7.6   | 92.1                     |
| 920                                                                                                    | 178.1×10 <sup>-9</sup>                    | 34.867                             | 0.071 | 0.0192                             | 0.0015 | 0.0154                             | 0.0022 | 0.0068                             | 0.0023 | 0.056  | 42.2                      | 291.5              | 6.7   | 94.3                     |
| 990                                                                                                    | 257.7×10 <sup>-9</sup>                    | 33.871                             | 0.068 | 0.0149                             | 0.0010 | 0.0134                             | 0.0021 | 0.0039                             | 0.0007 | 0.048  | 78.3                      | 290.3              | 4.1   | 96.6                     |
| 1060                                                                                                   | 72.4×10 <sup>-9</sup>                     | 34.133                             | 0.106 | 0.0170                             | 0.0030 | 0.0633                             | 0.0152 | 0.0066                             | 0.0031 | 0.228  | 88.4                      | 285.9              | 8.4   | 94.3                     |
| 1150                                                                                                   | 83.0×10 <sup>-9</sup>                     | 33.893                             | 0.088 | 0.0274                             | 0.0018 | 0.0441                             | 0.0026 | 0.0042                             | 0.0021 | 0.159  | 100.0                     | 289.8              | 6.4   | 96.4                     |

J – characteristic of the neutron flux during irradiation of samples.
